# Supplementary material for: H2A.Z overexpression suppresses senescence and chemosensitivity in pancreatic ductal adenocarcinoma
Source: PubMed Central journal article supplement (PMC7979544; doi:10.1038/s41388-021-01664-1), 2021-02-24

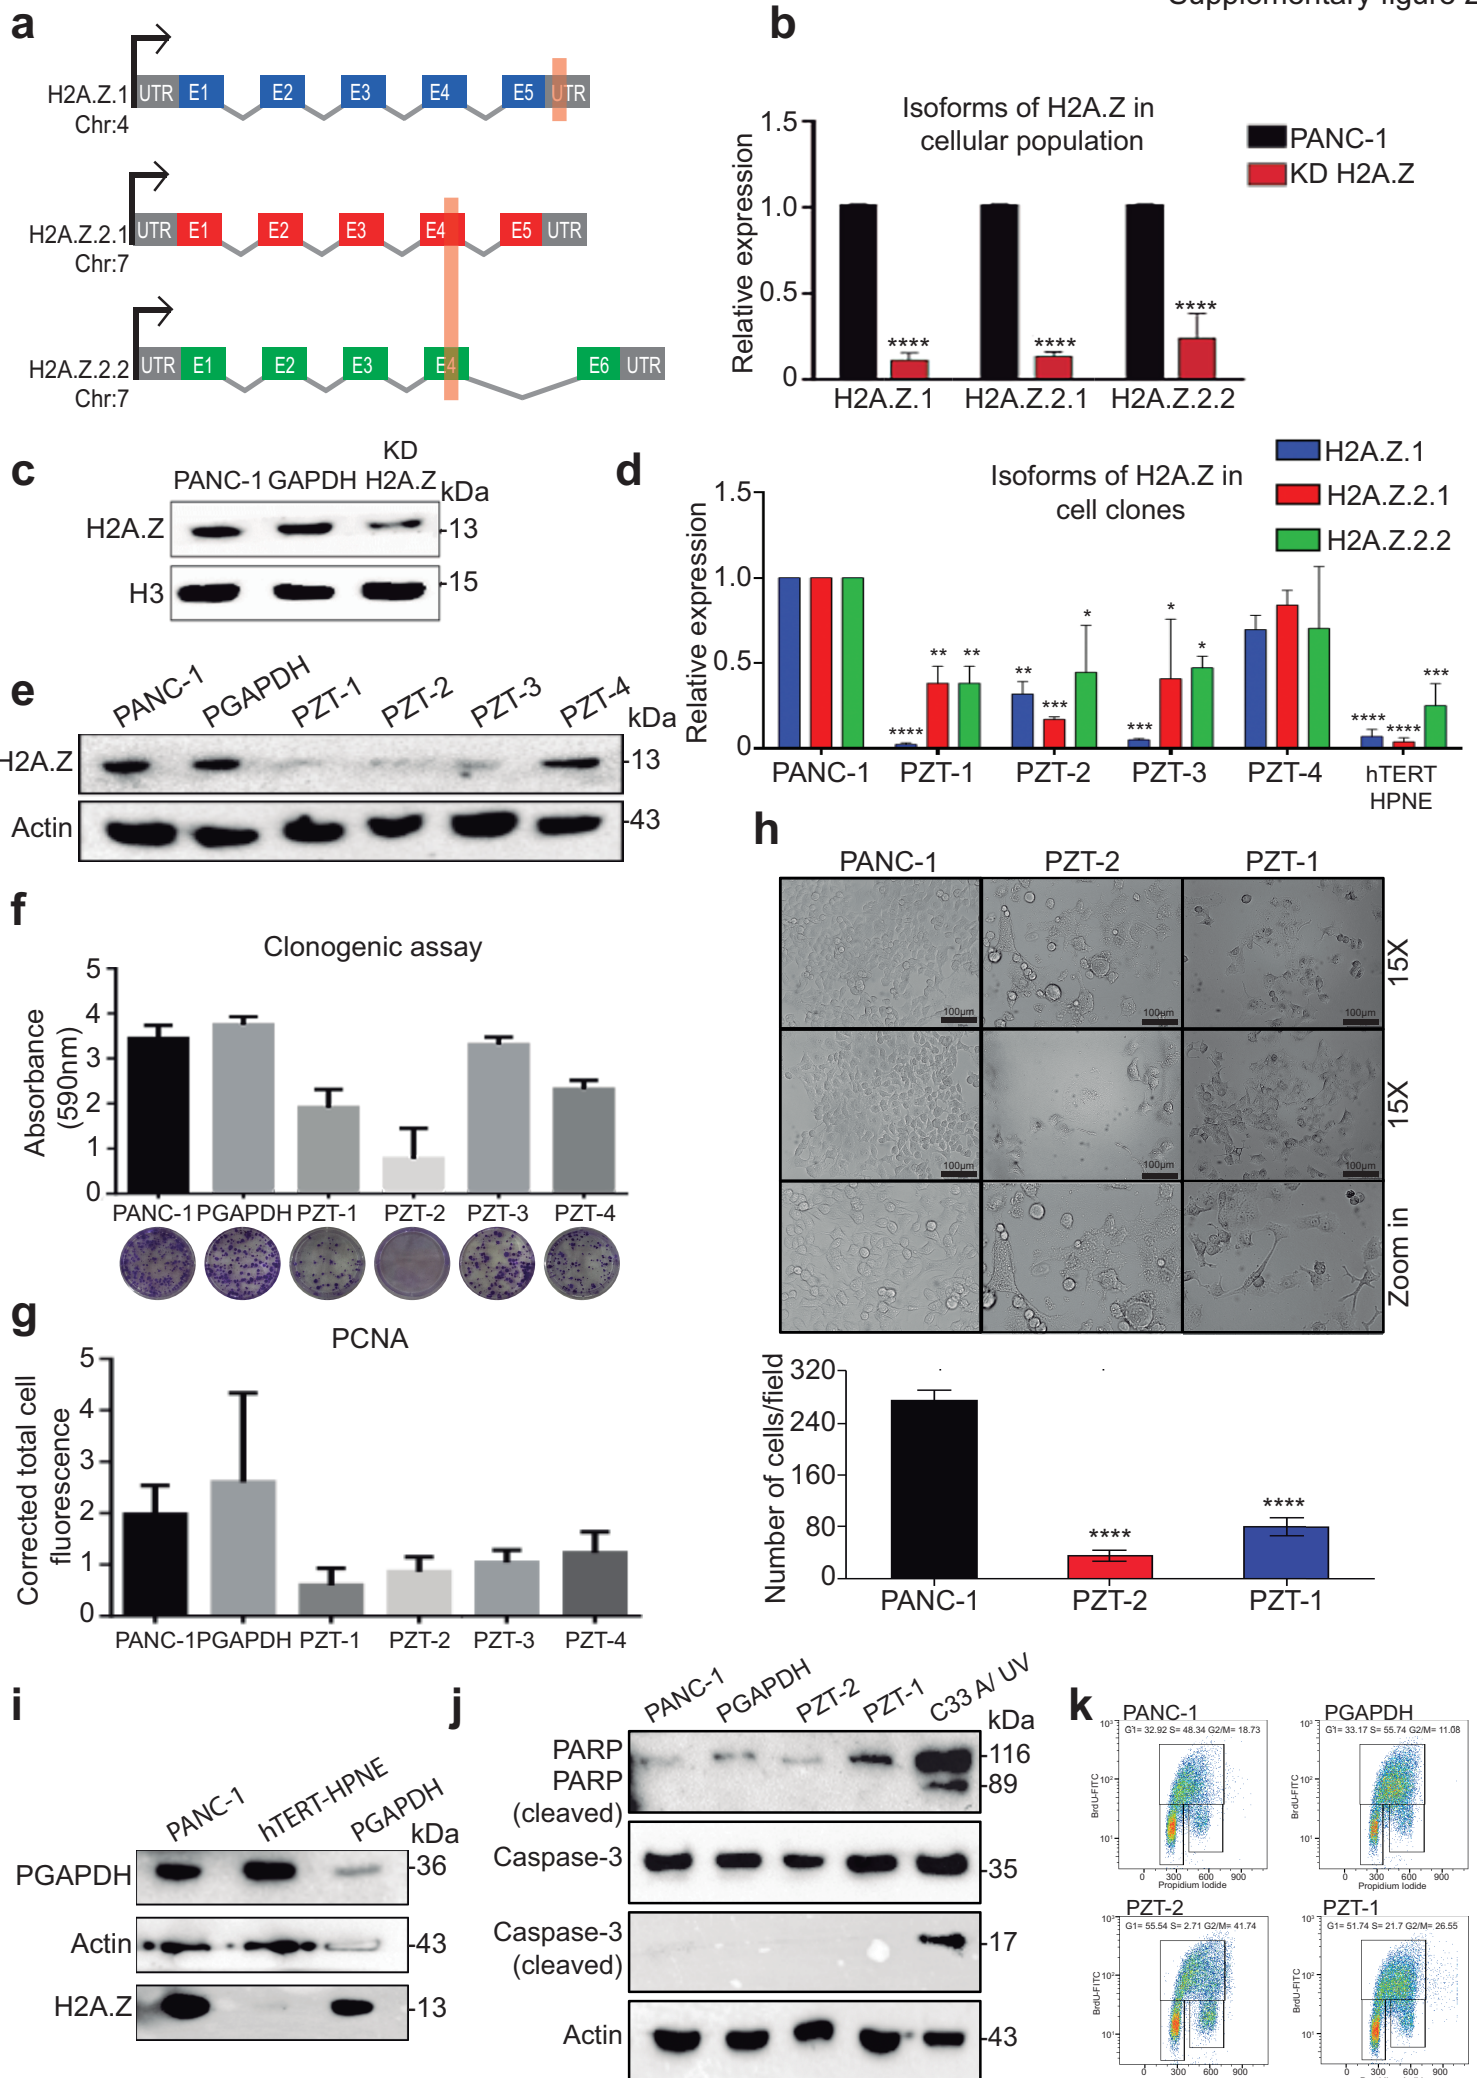

Supplement: 41388_2021_1664_MOESM2_ESM.pdf [file 41388_2021_1664_MOESM2_ESM.pdf]
